# Supplementary material for: Novel dinitromethyl-featured polynitro energetic salts
Source: Royal Society of Chemistry journal article supplement (doi:10.1039/c6dt03239g), 2016-01-01
Supplement: c6dt03239g1.pdf [file c6dt03239g1.pdf]

# Supplementary Information

## Novel dinitromethyl-featured polynitro energetic salts

Ying Li<sup>ab</sup>, Haifeng Huang<sup>b</sup>, Xiangyang Lin<sup>a\*</sup>, Renming Pan<sup>a</sup>, Jun Yang<sup>b\*</sup>

<sup>a</sup>School of Chemical Engineering, Nanjing University of Science and Technology,

Xiaolingwei 200, Nanjing, Jiangsu, China. E-mail: linxiangyang@njust.edu.cn;

<sup>b</sup>Shanghai Institute of Organic Chemistry, Chinese Academy of Sciences, Ling Ling Road 345, Shanghai, China. E-mail: yangj@sioc.ac.cn.

### X-ray crystallography

The relevant data and parameters for the X-ray measurements and refinements of the salt **5** are summarized in Table S1.

**Table S1** Crystallographic data for salt **5**·1.5H<sub>2</sub>O

|                                                                                     | <b>5</b> ·1.5H <sub>2</sub> O                                   |
|-------------------------------------------------------------------------------------|-----------------------------------------------------------------|
| CCDC                                                                                | 1484784                                                         |
| Formula                                                                             | C <sub>10</sub> H <sub>24</sub> N <sub>18</sub> O <sub>21</sub> |
| FW (g mol <sup>-1</sup> )                                                           | 732.47                                                          |
| Temperature (K)                                                                     | 293(2)                                                          |
| Crystal system                                                                      | Triclinic                                                       |
| Space group                                                                         | P -1                                                            |
| Z                                                                                   | 2                                                               |
| <i>a</i> (Å)                                                                        | 6.8808(18)                                                      |
| <i>b</i> (Å)                                                                        | 13.354(3)                                                       |
| <i>c</i> (Å)                                                                        | 15.942(4)                                                       |
| $\alpha$ (°)                                                                        | 89.832(6)                                                       |
| $\beta$ (°)                                                                         | 81.391(6)                                                       |
| $\gamma$ (°)                                                                        | 75.199(6)                                                       |
| <i>V</i> (Å <sup>3</sup> )                                                          | 1399.3(6)                                                       |
| <i>D<sub>c</sub></i> (g cm <sup>-3</sup> )                                          | 1.738                                                           |
| $\mu$ (mm <sup>-1</sup> )                                                           | 0.167                                                           |
| <i>F</i> (000)                                                                      | 756                                                             |
| $\theta$ (°)                                                                        | 1.578-25.000                                                    |
| Refl. coll.                                                                         | 7773                                                            |
| Independ. refl. [ <i>R</i> <sub>int</sub> ]                                         | 4926 [0.0376]                                                   |
| <i>S</i>                                                                            | 1.021                                                           |
| <i>R</i> <sub>1</sub> , <i>wR</i> <sub>2</sub> [ <i>I</i> >2 $\sigma$ ( <i>I</i> )] | 0.0693, 0.1579                                                  |
| <i>R</i> <sub>1</sub> , <i>wR</i> <sub>2</sub> (all)                                | 0.1098, 0.1805                                                  |

### Theoretical study

#### Heat of formation

Based on the Born-Haber energy cycle, the heat of formation of a salt can be simplified according to Equation (1), where  $\Delta H_L$  is the lattice energy of the salt.

$$\Delta H_f^\circ(\text{ionic salt, 298K}) = \Delta H_f^\circ(\text{cation, 298K}) + \Delta H_f^\circ(\text{anion, 298K}) - \Delta H_L \quad (1)$$

The  $\Delta H_L$  value could be predicted by the formula suggested by Jenkins et al [Eq. (2)],<sup>[1]</sup> where  $U_{\text{POT}}$  is the lattice potential energy and  $n_M$  and  $n_X$  depend on the nature of the ions  $M^{p+}$  and  $X^{q-}$ , respectively, and are equal to three for monoatomic ions, five for linear polyatomic ions, and six for nonlinear polyatomic ions.

$$\Delta H_L = U_{\text{POT}} + [p(n_M/2 - 2) + q(n_X/2 - 2)]RT \quad (2)$$

The equation for the lattice potential energy,  $U_{\text{POT}}$ , takes the form of Equation (3), where  $\rho_m$  is the density ( $\text{g cm}^{-3}$ ),  $M_m$  is the chemical formula mass of the ionic material ( $\text{g}$ ), and the coefficients  $\gamma$  ( $\text{kJ}^{-1} \text{mol}^{-1} \text{cm}$ ) and  $\delta$  ( $\text{kJ}^{-1} \text{mol}^{-1}$ ) are assigned literature values.<sup>[1]</sup>

$$U_{\text{POT}} (\text{kJ}^{-1} \text{mol}^{-1}) = \gamma (\rho_m/M_m)^{1/3} + \delta \quad (3)$$

Table S2 Ab Initio computational data

| Compounds                                    | $E_0^a$<br>(Hartree) | ZPE <sup>b</sup><br>(Hartree) | $H_T^c$<br>(Hartree) | HOF <sup>d</sup><br>(kJ/mol) |
|----------------------------------------------|----------------------|-------------------------------|----------------------|------------------------------|
| CH <sub>4</sub>                              | -40.39849            | 0.044793                      | 0.003812             | -74.6 <sup>[2a]</sup>        |
| NH <sub>3</sub>                              | -56.43418            | 0.034372                      | 0.003818             | -45.9 <sup>[2a]</sup>        |
| CH <sub>3</sub> CH <sub>3</sub>              | -79.60944            | 0.074599                      | 0.004428             | -83.8 <sup>[2b]</sup>        |
| CH <sub>3</sub> NO <sub>2</sub>              | -244.5544            | 0.049856                      | 0.005273             | -74.3 <sup>[2a]</sup>        |
| CH <sub>3</sub> NH <sub>2</sub>              | -95.63188            | 0.064032                      | 0.004369             | -23.0 <sup>[2d]</sup>        |
| FOX-7                                        | -597.2172            | 0.091946                      | 0.010218             | -134.1 <sup>[2*]</sup>       |
| Urea                                         | -224.8302            | 0.062316                      | 0.005299             | -235.5 <sup>[2a]</sup>       |
| CH <sub>3</sub> CH <sub>2</sub> <sup>-</sup> | -78.92410            | 0.057501                      | 0.004496             | 133.1 <sup>[2a]</sup>        |
| ATNP Anion                                   | -1157.362            | 0.121910                      | 0.017947             | -543.1                       |

<sup>a</sup> Total energy ( $E_0$ ) calculated by B3LYP/6-31+G\*\*/MP2/6-311++G\*\* method (Hartree/Particle);

<sup>b</sup> Zero-point correction (ZPE) (Hartree/Particle); <sup>c</sup> Values of thermal correction ( $H_T$ ) (Hartree/Particle); <sup>d</sup> Heat of formation (HOF) (kJ/mol).

## Energetic properties

Detonation pressures ( $P$ ) and detonation velocities ( $D$ ) were calculated according to the Kamlet-Jacobs equations (Eq. 4 and 5),<sup>[3]</sup>

$$D = 1.01(N \bar{M}^{1/2} Q^{1/2})^{1/2}(1 + 1.30\rho) \quad (4)$$

$$P = 1.558\rho^2 \bar{M}^{1/2} Q^{1/2} \quad (5)$$

For compound with the molecular formula of  $C_aH_bO_cN_d$ ,  $c \geq 2a+b/2$  (suitable for the salt **1** in this study),  $Q$  can be calculated according to Eq. 6.

$$Q = \frac{28.9b + 94.05a + 0.239\Delta H_f^0}{M} \times 10^3 \quad (6)$$

For compound with the molecular formula of  $C_aH_bO_cN_d$ ,  $2a+b/2 > c \geq b/2$  (suitable for all the salts in this study except **1**),  $Q$  can be calculated according to Eq. 7.

$$Q = \frac{28.9b + 94.05(\frac{c}{2} - \frac{b}{4}) + 0.239\Delta H_f^0}{M} \times 10^3 \quad (7)$$

where each term in Eq. 4, 5, 6 and 7 is defined as follows:  $D$ , the detonation velocity ( $\text{km s}^{-1}$ );  $P$ , the detonation pressure (GPa);  $N$ , the moles of detonation gases per gram explosive;  $\bar{M}$ , the average molecular weight of these gases ( $\text{g mol}^{-1}$ );  $Q$ , the heat of detonation ( $\text{J g}^{-1}$ );  $M$ , molecular weight of the compound ( $\text{g mol}^{-1}$ ); and  $\rho$ , the loaded densities of explosives ( $\text{g cm}^{-3}$ ). Density measured by gas pycnometer at  $25^\circ\text{C}$ .

- 
- [1] H. D. B. Jenkins, D. Tudela and L. Glasser, *Inorg. Chem.*, 2002, **41**, 2364-2367.  
[2] (a) Z. Zeng, H. Gao, B. Twamley and J. M. Shreeve, *J. Mater. Chem.*, 2007, **17**, 3819-3826; (b) C. Ye, H. Gao, B. Twamley and J. M. Shreeve, *New. J. Chem.*, 2008, **32**, 317-322; (c) From NIST webbook. (d) T. T. Vo and J. M. Shreeve, *J. Mater. Chem. A*, 2015, **3**, 8756-8763.  
[3] (a) M. J. Kamlet and S. J. Jacobs, *J. Chem. Phys.*, 1968, **48**, 23-35; (b) M. J. Kamlet and J. E. Ablard, *J. Chem. Phys.*, 1968, **48**, 36-42; (c) M. J. Kamlet and C. Dicknison, *J. Chem. Phys.*, 1968, **48**, 43-49; (d) H. Gao, C. Ye, C. Piekarski and J. M. Shreeve, *J. Phys. Chem., C*, 2007, **111**(28), 10718-10731.
